# Supplementary material for: Nanomaterial Exposure, Extracellular Vesicle Biogenesis and Adverse Cellular Outcomes: A Scoping Review
Source: Nanomaterials (Basel). 2022 Apr 6;12(7):1231. doi: 10.3390/nano12071231 (PMC9000848; doi:10.3390/nano12071231)
Supplement: Supplementary file 1 [file nanomaterials-12-01231-s001.zip › nanomaterials-1650688-supplementary.pdf]

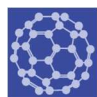

## Supplementary Materials

# Nanomaterial Exposure, Extracellular Vesicle Biogenesis and Adverse Cellular Outcomes: A Scoping Review

Thais S. M. Lima <sup>1,2</sup>, Wanderson Souza <sup>1,2</sup>, Luths R. O. Geaquinto <sup>1,2</sup>, Priscila L. Sanches <sup>1,3</sup>, Ewa. L. Stepień <sup>4</sup>, João Meneses <sup>5</sup>, Eli Fernández-de Gortari <sup>5</sup>, Nicole Meisner-Kober <sup>6</sup>, Martin Himly <sup>6</sup>, José M. Granjeiro <sup>1,2,3,7,\*</sup> and Ana R. Ribeiro <sup>2,5,\*</sup>

<sup>1</sup> Directory of Life Sciences Applied Metrology, National Institute of Metrology Quality and Technology, 25250-020, Rio de Janeiro, Brazil; thaismellolima@gmail.com (T.S.M.L.); wstudzel@gmail.com (W.S.);

luthsgeaquinto@gmail.com (L.R.O.G.); plaviolasanches@gmail.com (P.L.S.)

<sup>2</sup> Postgraduate Program in Biotechnology, National Institute of Metrology Quality and Technology, 25250-020, Rio de Janeiro, Brazil

<sup>3</sup> Postgraduate Program in Translational Biomedicine, University Grande Rio, 25071-202 Duque de Caxias, Brazil

<sup>4</sup> Faculty of Physics, Astronomy, and Applied Computer Science, Jagiellonian University, 30-348 Kraków, Poland; e.stepien@uj.edu.pl (E.L.S.)

<sup>5</sup> NanoSafety Group, International Iberian Nanotechnology Laboratory, 4715-330 Braga, Portugal; joao.meneses@inl.int (J.M.); eli.fernandez@inl.int (E.F.-d.G.)

<sup>6</sup> Department of Biosciences & Medical Biology, University of Salzburg, 5020, Salzburg, Austria; nicole.meisner-kober@plus.ac.at (N.M.-K.); martin.himly@plus.ac.at (M.H.)

<sup>7</sup> Dental School, Fluminense Federal University, 24020-140 Niterói, Brazil

\* Correspondence: jmgranjeiro@gmail.com (J.M.G.); ana.ribeiro@inl.int (A.R.R.)

**Table S1.** Search strategy used in the gray literature databases included in the study.

| Database                                    | Keywords                                                                                                                                                                                                                                                                                                                                                                                                     |
|---------------------------------------------|--------------------------------------------------------------------------------------------------------------------------------------------------------------------------------------------------------------------------------------------------------------------------------------------------------------------------------------------------------------------------------------------------------------|
| Grey Literature Report                      | ("exosome" OR "EVs" OR "Extracellular vesicles" OR "Apoptotic bodies" OR "MVBs" OR "Multivesicular bodies") AND ("nanoparticles" OR "NPs" OR "nanomaterials") AND ("toxicology" OR "toxicity" OR "inflammation" OR "composition" OR "biological function" OR "biogenesis" OR "cellular biology" OR "cargo" OR "effects" OR "signaling" OR "communication" OR "cellular response" OR "biological activities") |
| World Health Organization (Library Catalog) | ("exosome" OR "EVs" OR "Extracellular vesicles" OR "Apoptotic bodies" OR "MVBs" OR "Multivesicular bodies") AND ("nanoparticles" OR "NPs" OR                                                                                                                                                                                                                                                                 |

|                                                       |                                                                                                                                                                                                                                                                                                                                                                                                                     |
|-------------------------------------------------------|---------------------------------------------------------------------------------------------------------------------------------------------------------------------------------------------------------------------------------------------------------------------------------------------------------------------------------------------------------------------------------------------------------------------|
|                                                       | <p>“nanomaterials”) AND (“toxicology” OR “toxicity” OR “inflammation” OR “composition” OR “biological function” OR “biogenesis” OR “cellular biology” OR “cargo” OR “effects” OR “signaling” OR “communication” OR “cellular response” OR “biological activities”)</p>                                                                                                                                              |
| Networked Digital Library of Theses and Dissertations | <p>(“exosome” OR “EVs” OR “Extracellular vesicles” OR “Apoptotic bodies” OR “MVBs” OR “Multivesicular bodies”) AND (“nanoparticles” OR “NPs” OR “nanomaterials”) AND (“toxicology” OR “toxicity” OR “inflammation” OR “composition” OR “biological function” OR “biogenesis” OR “cellular biology” OR “cargo” OR “effects” OR “signaling” OR “communication” OR “cellular response” OR “biological activities”)</p> |
| CADTH Evidence Driven                                 | <p>(“exosome” OR “EVs” OR “Extracellular vesicles” OR “Apoptotic bodies” OR “MVBs” OR “Multivesicular bodies”) AND (“nanoparticles” OR “NPs” OR “nanomaterials”) AND (“toxicology” OR “toxicity” OR “inflammation” OR “composition” OR “biological function” OR “biogenesis” OR “cellular biology” OR “cargo” OR “effects” OR “signaling” OR “communication” OR “cellular response” OR “biological activities”)</p> |

**Table S2.** Inclusion and exclusion criteria.

| PECO       | Inclusion                                                                                                                               | Exclusion                                                                                                                                                                                               |
|------------|-----------------------------------------------------------------------------------------------------------------------------------------|---------------------------------------------------------------------------------------------------------------------------------------------------------------------------------------------------------|
| Population | In vitro, in vivo, ex vivo studies and clinical trials that isolated extracellular vesicles after exposure to any type of nanomaterial. | Extracellular vesicles isolated from experimental models that are not similar to humans such as: plants, viruses, fungi, bacteria and aquatic animals for isolation of extracellular vesicles.          |
| Exposure   | Exhibition of any type of nanomaterial.                                                                                                 | Exposure to materials on the micrometric scale; Exposure to drugs that use nanomaterials only as a vehicle and that do not present any type of response derived only from exposure to the nanomaterial. |
| Comparison | Studies that isolated extracellular vesicles without exposure to any type of nanomaterial (control).                                    | Studies that did not analyze extracellular vesicles without exposure to any type of nanomaterial.                                                                                                       |

---

|                     |                                                                                                                                  |                                                                                                                                                                                                                                                                                               |
|---------------------|----------------------------------------------------------------------------------------------------------------------------------|-----------------------------------------------------------------------------------------------------------------------------------------------------------------------------------------------------------------------------------------------------------------------------------------------|
| Outcome             | Cellular responses mediated by extracellular vesicles induced after exposure to nanomaterials;                                   | Studies focusing on extracellular vesicle isolation method;<br>Studies that do not show cellular responses mediated by extracellular vesicles                                                                                                                                                 |
|                     | Changes in extracellular vesicles induced by exposure to any type of nanomaterial such as number, morphology, content, size etc. | Studies focusing on improving techniques;<br>Studies that demonstrate the release of apoptotic bodies during cell death, but do not show cellular responses derived from cell communication mediated by this extracellular vesicle or changes such as number, morphology, content, size, etc. |
| Type of publication | Only articles with original data and systematic or scope-based review articles based on original articles.                       | Articles without original data such as editorials, narrative reviews, book chapters, letters and comments.                                                                                                                                                                                    |

---

**Table S3.** Initial information regarding the included studies.

| Reference | Title                                                                                                | DOI                   | Year | Country       | Periodical   |
|-----------|------------------------------------------------------------------------------------------------------|-----------------------|------|---------------|--------------|
| [20]      | Cellular communication via nanoparticle-transporting biovesicles                                     | 10.2217/nnm.13.57     | 2014 | United States | Nanomedicine |
| [22]      | Nanoparticle-Induced Exosomes Target Antigen-Presenting Cells to Initiate Th1-Type Immune Activation | 10.1002/sml.201200381 | 2012 | China         | Small        |
| [24]      | Exosomal miRNA Profiling to Identify Nanoparticle Phagocytic Mechanisms                              | 10.1002/sml.201704008 | 2018 | China         | Small        |

---

---

|      |                                                                                                                                                                                                      |                            |      |        |                                                        |
|------|------------------------------------------------------------------------------------------------------------------------------------------------------------------------------------------------------|----------------------------|------|--------|--------------------------------------------------------|
| [25] | Human primary macrophages scavenge AuNPs and eliminate it through exosomes. A natural shuttling for nanomaterials                                                                                    | 10.1016/j.ejpb.2019.02.014 | 2019 | Italy  | European Journal of Pharmaceutics and Biopharmaceutics |
| [26] | The Fate of SWCNTs in Mouse Peritoneal Macrophages: Exocytosis, Biodegradation, and Sustainable                                                                                                      | 10.3389/fbioe.2020.00211   | 2020 | China  | Frontiers in Bioengineering and Biotechnology          |
| [39] | Effects of subtoxic concentrations of TiO <sub>2</sub> and ZnO nanoparticles on human lymphocytes, dendritic cells and exosome production                                                            | 10.1016/j.taap.2012.07.021 | 2012 | Sweden | Toxicology and Applied Pharmacology                    |
| [40] | Exosomes Derived from Bone Mesenchymal Stem Cells with the Stimulation of Fe <sub>3</sub> O <sub>4</sub> Nanoparticles and Static Magnetic Field Enhance Wound Healing Through Upregulated miR-21-5p | 10.2147/IJN.S275650        | 2020 | China  | International Journal of Nanomedicine.                 |
| [41] | Exosomes as Extrapulmonary Signaling Conveyors for Nanoparticle-Induced Systemic Immune Activation                                                                                                   | 10.1002/sml.201101708      | 2012 | China  | Small                                                  |

---

---

|      |                                                                                                                                                                                                        |                                 |      |               |                                       |
|------|--------------------------------------------------------------------------------------------------------------------------------------------------------------------------------------------------------|---------------------------------|------|---------------|---------------------------------------|
| [42] | Calcium phosphate particles stimulate exosome secretion from phagocytes for the enhancement of drug delivery                                                                                           | 10.1016/j.colsurfb.2018.07.037  | 2018 | China         | Colloids and Surfaces B-Biointerfaces |
| [43] | Gold nanoparticles change small extracellular vesicle attributes of mouse embryonic stem cells                                                                                                         | 10.1039/D0NR03598J              | 2020 | China         | Nanoscale                             |
| [44] | Platinum Nanoparticles Enhance Exosome Release in Human Lung Epithelial Adenocarcinoma Cancer Cells (A549): Oxidative Stress and the Ceramide Pathway are Key Players                                  | 10.2147 / IJN.S291138           | 2021 | Korea         | Int J Nanomedicine                    |
| [45] | Palladium Nanoparticle-Induced Oxidative Stress, Endoplasmic Reticulum Stress, Apoptosis, and Immunomodulation Enhance the Biogenesis and Release of Exosome in Human Leukemia Monocytic Cells (THP-1) | 10.2147/IJN.S305269             | 2021 | Korea         | Int J Nanomedicine                    |
| [46] | Biogenesis of Extracellular Vesicles Produced from Human-Stem-Cell-Derived Cortical Spheroids Exposed to Iron Oxides                                                                                   | 10.1021/acsbiomaterials.0c01286 | 2021 | United States | ACS Biomater Sci Eng                  |

---

|      |                                                                                                                                                                                                     |                                         |      |               |                     |  |
|------|-----------------------------------------------------------------------------------------------------------------------------------------------------------------------------------------------------|-----------------------------------------|------|---------------|---------------------|--|
|      |                                                                                                                                                                                                     |                                         |      |               |                     |  |
| [47] | Effect of multi-functional polyhydroxylated polyhedral oligomeric silsesquioxane (POSS) nanoparticles on the angiogenesis and exosome biogenesis in human umbilical vein endothelial cells (HUVECs) | 10.1016/j.matdes.2020.109227            | 2021 | Iran          | Materials & Design  |  |
| [48] | Nano-hydroxyapatite accelerates vascular calcification via lysosome impairment and autophagy dysfunction in smooth muscle cells                                                                     | doi.org/10.1016/j.bioactmat.2021.06.004 | 2021 | China         | Bioactive Materials |  |
| [49] | Shedding plasma membrane vesicles induced by graphene oxide nanoflakes in brain cultured astrocytes                                                                                                 | 10.1016/j.carbon.2021.01.142            | 2021 | Italy         | Carbon              |  |
| [50] | Cell membrane disintegration and extracellular vesicle release in a model of different size and charge PAMAM dendrimers effects on cultured endothelial cells                                       | 10.1080/17435390.2019.1570373           | 2019 | United States | Nanotoxicology      |  |

---

---

|      |                                                                                                                  |                    |      |       |                                     |
|------|------------------------------------------------------------------------------------------------------------------|--------------------|------|-------|-------------------------------------|
| [51] | In situ self-assembly Ag -<br>Fe <sub>3</sub> O <sub>4</sub> nanoclusters in<br>exosomes for<br>cancer diagnosis | 10.1039/C9TB02610J | 2020 | China | Journal of Materials<br>Chemistry B |
|------|------------------------------------------------------------------------------------------------------------------|--------------------|------|-------|-------------------------------------|

---

**Table S4.** Biological models used in the included studies.

| Reference | Biological models | Type of assay               | Experimental size (n)       | Quality control of the biological sample |
|-----------|-------------------|-----------------------------|-----------------------------|------------------------------------------|
| [20]      | Human             | In vitro                    | -                           | -                                        |
| [22]      | Mouse             | In vivo                     | n = 48                      | -                                        |
| [24]      | Human             | Clinical trial and In vitro | n = 154                     | -                                        |
| [25]      | Human             | In vitro                    | n = 5                       | -                                        |
| [26]      | Mouse             | In vitro                    | n = 3                       | Cell authenticity (CD11b >95%)           |
| [39]      | Human             | In vitro                    | n = 6–8                     | Trypan Blue, (viability > 90%)           |
| [40]      | Human             | In vitro                    | n = 3                       | -                                        |
| [40]      | Human<br>Mouse    | In vitro<br>In vivo         | Cells (n=3)<br>Mouse (n=24) | -                                        |
| [42]      | Human             | In vitro and in vivo        | n=6                         | -                                        |

---

|      |                |          |         |  |  |   |  |
|------|----------------|----------|---------|--|--|---|--|
|      | Mouse          |          |         |  |  |   |  |
| [43] | Mouse          | In vitro | n = 3   |  |  |   |  |
| [44] | Human          | In vitro | n = 3–8 |  |  | - |  |
| [45] | Human          | In vitro | n = 3   |  |  | - |  |
| [46] | Mouse          | In vivo  | n = 48  |  |  | - |  |
| [47] | Human<br>Mouse | In vitro | n = 6   |  |  | - |  |
| [48] | Camundongo     | In vitro | n = 3   |  |  | - |  |
| [49] | Humano         | In vitro | n = 3   |  |  | - |  |
| [50] | Humano         | In vitro | n = 3   |  |  | - |  |
| [51] | Humano         | In vitro | n = 3   |  |  | - |  |

**Table S5.** Characteristics of nanomaterials.

| Reference | Nanomaterial     | Morphology /<br>Crystalline<br>structure | Size  | Z Potencial                                       | PDI | Purity | Characterization<br>Methods |
|-----------|------------------|------------------------------------------|-------|---------------------------------------------------|-----|--------|-----------------------------|
| [20]      | PEI-SPION<br>NPs | -                                        | 15 nm | Low density:<br>4.5 mV<br>High density:<br>7.7 mV | -   | -      | -                           |

|      |                      |            |                                                                         |                                      |                          |                                               |                                                        |
|------|----------------------|------------|-------------------------------------------------------------------------|--------------------------------------|--------------------------|-----------------------------------------------|--------------------------------------------------------|
| [22] | MIONs                | -          | P: 43 nm<br>CM: 43 ± 5 nm                                               | -                                    | -                        | LPS < 0.25 EU ml <sup>-1</sup>                | TEM, X-ray diffraction, BET                            |
|      | SiO <sub>2</sub> NPs | -          | 10–20 nm                                                                |                                      |                          |                                               |                                                        |
| [24] | Occupational NPs     | -          | -                                                                       | -                                    | -                        | ≈ 99,5%                                       | -                                                      |
|      |                      |            | P: 20 nm                                                                |                                      |                          |                                               |                                                        |
| [25] | AuNPs                | -          | Water: 20.5 nm (T0h), 20.2 nm (T24h), CM: 19.5 nm (T0h), 19.9 nm (T24h) | -                                    | -                        | -                                             | ICP-MS, NTA, Laser scanning confocal microscopy (LSCM) |
| [26] | SWNCTs               | Fiber-like | 200–1000 nm                                                             | -44.1 mV (pH 12);<br>-23,2 mV (pH 2) | -                        | > 95%                                         | ZetaSizer NANO, TEM                                    |
|      | TiO <sub>2</sub> NPs |            | P: 21nm;<br>CM: 28.6 nm                                                 | -12.2 ± 0.25 mV                      | TiO <sub>2</sub> : 0,563 | LPS: NPs < 50 pg/mL; Culture media < 5 pg/mL) | DLS                                                    |
| [39] | ZnO NPs              | -          | P: 10 nm;<br>CM: 16.9 nm                                                | 11.4 ± 0.17 mV                       | ZnO, 0,410               |                                               |                                                        |

|      |                                |                                             |                 |                                                                             |   |                                  |                                                         |
|------|--------------------------------|---------------------------------------------|-----------------|-----------------------------------------------------------------------------|---|----------------------------------|---------------------------------------------------------|
| [40] | Fe <sub>3</sub> O <sub>4</sub> | -                                           | 100 nm          | -                                                                           | - | -                                | -                                                       |
|      |                                |                                             | P: 43 nm        |                                                                             |   |                                  |                                                         |
| [41] | MIONs                          | Cubic                                       | Solution: 43 nm | -                                                                           | - | LPS < 0.25 EU ml <sup>-1</sup> ) | TEM, X-ray diffraction, BET                             |
| [42] | CaP                            | Spherical or oval                           | 1.84 ± 0,48 μm  | -2,49 mV                                                                    | - | -                                | SEM, EDS, DLS, XRD, ICP-OES                             |
| [43] | AuNPs                          | Spherical                                   | 5, 20, 80 nm    | AuNPs-5: -22.01 ± 1.81 mV, AuNPs-20: -32.17± 2.19, AuNPs-80: -55.21± 7.34mV | - | -                                | TEM, UV-vis spectroscopy, DLS, Hyperspectral microscopy |
| [44] | PtNPs                          | Spherical, triangular, oval, and rod-shaped | 40–50 nm        | -                                                                           | - | -                                | UV-vis spectroscopy, XRD, FITR, DLS, TEM, SEM           |
| [45] | PdNPs                          | Spherical                                   | ~20 nm          | -                                                                           | - | -                                | UV-vis spectroscopy, XRD, FITR, DLS, TEM, SEM           |

|      |                                    |           |              |                                                                             |   |                                                                 |                                                         |
|------|------------------------------------|-----------|--------------|-----------------------------------------------------------------------------|---|-----------------------------------------------------------------|---------------------------------------------------------|
| [46] | Fe <sub>3</sub> O <sub>4</sub> NPs | Spherical | 8, 15, 30 nm | -                                                                           | - | 8 nm (99.9%),<br>15-20 nm<br>(99.5%) and<br>20-30 nm<br>(99.0%) | -                                                       |
| [47] | POSS NPs                           | Spherical | 3–5 nm       | -                                                                           | - | -                                                               | FT-IR, TEM, NMR<br>spectroscopy                         |
| [48] | nHAp                               | Rod-like  | <100 nm      | -                                                                           | - | 97%                                                             | SEM, EDS, X-ray dif-<br>fraction, TEM                   |
| [49] | s-GO                               | -         | 50-500 nm    | -55.9 ± 1.4<br>mV                                                           | - | LPS free                                                        | ZetaSizer NANO, TEM,<br>AFM, micro-Rman<br>spectrometer |
| [50] | PAMAM G2                           | -         | G2: 3 nm     | G2-NH <sub>2</sub> :<br>19,8mV;<br>G2-COOH:<br>-21,7 mV;<br>G2-OH:<br>4,8mV | - | -                                                               | DLS                                                     |
|      | PAMAM G7                           |           |              | G7 NH <sub>2</sub> :<br>30,1mV;<br>G7-COOH:                                 |   |                                                                 |                                                         |

---

|      |     |   |                                                                     |                                     |   |   |                                                |
|------|-----|---|---------------------------------------------------------------------|-------------------------------------|---|---|------------------------------------------------|
|      |     |   |                                                                     | -19,5mV;<br>2,8mV; G7-<br>OH: 2,8mV |   |   |                                                |
| [51] | NCs | - | Ag NCs: 1.3<br>nm;<br>Fe <sub>3</sub> O <sub>4</sub> NCs:<br>3.5 nm | -                                   | - | - | TEM, DLS, UV-vis<br>spectroscopy, EDS,<br>FTIR |

---

**Table S6.** Exposure conditions, and biological effects .

| Reference | Experimental model <sup>a</sup> | Concentration         | Time                                                    | Exposure conditions                                         | Biological effects <sup>e</sup>                                                |
|-----------|---------------------------------|-----------------------|---------------------------------------------------------|-------------------------------------------------------------|--------------------------------------------------------------------------------|
| [20]      | In vitro<br>Human<br>HMVECs     | 2–7 µg/mL             | 24 h                                                    | Immersion<br>CM                                             | PEI-SPION NPs uptake did not impact cell viability                             |
| [22]      | In vivo<br>Mouse<br>BALB/c      | 20 µg in 50<br>µL PBS | 3 times at<br>daily inter-<br>vals (day 0,<br>2, and 4) | Respiratory<br>exposure<br>(Intratrachea<br>1 instillation) | NPs transferred across the pulmonary<br>cell membrane and located in lysosomes |

|      |                                         |                         |       |                                        |                                                                                                                                    |
|------|-----------------------------------------|-------------------------|-------|----------------------------------------|------------------------------------------------------------------------------------------------------------------------------------|
|      | In Vitro<br>Human<br>THP-1              | 100 µg/mL               | 24 h  | Immersion<br>CM                        | -                                                                                                                                  |
| [24] | Clinical:<br>Pneumoconiosis<br>patients | -                       | -     | Exposed to<br>occupational<br>inhaling | -                                                                                                                                  |
| [25] | In vitro<br>Human<br>PBMCs              | 0.1, 1, 10 and<br>50 µM | 24h   | Immersion<br>CM                        | Internalization of AuNPs in the early<br>endosomes and/or in structures<br>resembling MVB.                                         |
| [26] | In vitro<br>Mouse<br>PMQ                | 10 µg/mL                | 0–48h | Immersion<br>CM                        | ↑ SWCNTs uptake with prolonged<br>exposure time<br>No significant cell death<br>Alteration in primary macrophages mor-<br>phology  |
| [39] | In vitro<br>Human<br>PBMC               | 0.5–100<br>µg/mL        | 24 h  | Immersion<br>CM                        | TiO <sub>2</sub> NPs: No cell death<br>ZnO: No differences in inactivation and<br>expression CD69 in T-cell.<br>↓ CD16 on NK-cells |
|      | In vitro                                |                         |       |                                        |                                                                                                                                    |

|      |                                           |                                |                        |                                                                   |                                                                                                                                                                                                         |
|------|-------------------------------------------|--------------------------------|------------------------|-------------------------------------------------------------------|---------------------------------------------------------------------------------------------------------------------------------------------------------------------------------------------------------|
|      | Human<br>MDDC                             |                                |                        |                                                                   | TiO <sub>2</sub> NPs: NPs active uptake. No alteration in surface markers<br>ZnO NPs: ↑ Cell death, ↑ Cas dose-dependent, ↑ DNA fragmentation. No NPs uptake and no change in surface marker expression |
| [40] | In Vitro<br>Human<br>BMSCs                | 400, 200, 100,<br>50, 25 µg/mL | 1, 3, and 5<br>days    | Immersion<br>CM                                                   | ↑ Cell viability in the optimal working concentration (50 µg/mL)                                                                                                                                        |
| [41] | In vivo<br>Mouse BALB/c                   | 20 µg in 50<br>µL PBS          | days 15, 17,<br>and 19 | Respiratory<br>exposure<br>(Intratra-<br>cheal instil-<br>lation) | NPs transferred across the pulmonary cell membrane and located in lysosomes<br>↑ Th1 polarization<br>↑ Tc1                                                                                              |
|      | In vivo<br>Mouse BALB/c<br>OVA-sensitized |                                |                        |                                                                   | Mouse BALB/c:<br>↑ Activated Th + Tc<br>↑ Th1, ↑ Tc1<br>↑ IFN-γ, ↑ IL-4<br>↑ Inflammation                                                                                                               |
| [42] | In vitro<br>Mouse<br>RAW264.7             | 250, 500, 1000,<br>2000 µg/mL  | 1-days                 | Immersion<br>CM                                                   | No alteration in proliferation                                                                                                                                                                          |
|      | In vitro<br>Human<br>THP-1                |                                |                        |                                                                   | No alteration in proliferation                                                                                                                                                                          |

---

|      |                                                          |                                        |                        |                 |                                                                                                                                           |
|------|----------------------------------------------------------|----------------------------------------|------------------------|-----------------|-------------------------------------------------------------------------------------------------------------------------------------------|
| [43] | In vitro<br>Mouse<br>mESCs                               | 1 µg/mL                                | 24–48 h                | Immersion<br>CM | LOEC: 5 µg/mL<br>Non-cytotoxic and does not induce ROS.<br>No interferences on self-renewal and pluripotency                              |
|      | In vitro<br>Human<br>A549                                | 0, 2.5, 5, 10,<br>20, and 40<br>µmol/L | 24h                    | Immersion<br>CM | ↑ Viability and proliferation<br>Morphological signals of autophagy<br>↑ ROS, ↑ Cas3, ↑ LDH, ↑ AchE                                       |
|      | In vitro<br>Human<br>THP-1                               | 5–25 µM                                | 24 h                   | Immersion<br>CM | -                                                                                                                                         |
|      | In vitro<br>Human<br>iNPCs Cortical<br>spheroids culture | 0, 1, 10 and<br>100 µM                 | 48 h                   | Immersion<br>CM | Changes in morphology<br>No effects on cell viability, metabolic activity, neurodegeneration, and oxidative stress.                       |
|      | In vitro<br>Human<br>HUVECs:                             | 0–600 ppm                              | 24 and 48h             | Immersion<br>CM | ↑ Viability, ↑ Migration, ↑ Wound healing, ↑ VEGFR-2, HSP-70, Ang-1, and Ang-2, ↑ miRNA-21 and miRNA-155, ↑ VEGF-A and TGF-β, ↓ miRNA-182 |
|      | In vitro<br>Mice C57BL/6<br>VSMCs                        | 100µg/mL                               | 24h, 7, and<br>14 days | Immersion<br>CM | ↑ ALP, Runx2, and OPN, ↑ Autophagic organelles, ↓ Lysosomal acidification, No effects on the viability, ↑ calcium deposition              |

|      |                                       |                  |        |                 |                                                                                                                                                                                                                                                                                                         |
|------|---------------------------------------|------------------|--------|-----------------|---------------------------------------------------------------------------------------------------------------------------------------------------------------------------------------------------------------------------------------------------------------------------------------------------------|
| [49] | In vitro<br>Rats Wistar<br>Astrocytes | 10 µg / mL       | 6 days | Immersion<br>CM | No impair astrocyte morphology and<br>cell density<br>No effect on viability<br>Did not cytotoxic effect                                                                                                                                                                                                |
| [50] | In vitro<br>Human<br>HUVECs           | 1–100 µg/mL      | 24h    | Immersion<br>CM | G2: Low cytotoxicity<br>Moderate g1 arrest of cell cycle<br>G2-NH <sub>2</sub> : ↑ ICAM-1(CD54), ↑ Apoptosis<br><br>G7: G7-NH <sub>2</sub> : ↑ ICAM-1(CD54), ↑ PS<br>↑ Apoptosis<br>↑ Necrosis<br>↑ Plasma membrane blebbing, disinte-<br>gration, and permeability<br>Moderate g1 arrest of cell cycle |
| [51] | In vitro<br>Human<br>L02              | 10–100<br>µmol/L | 24h    | Immersion<br>CM | Induce dose-dependent cytotoxicity<br>↓ Viability                                                                                                                                                                                                                                                       |
|      | In vitro Human<br>HepG2               |                  |        |                 | Not difference in cytotoxicity                                                                                                                                                                                                                                                                          |

**Table S7.** Characterization of Extracellular Vesicles.

| Reference | Biological<br>origin and<br>fluid collection | Isolation | EVs<br>Nomenclature | Size | Characterization | EVs En-<br>riched<br>markers | Not en-<br>riched<br>markers |
|-----------|----------------------------------------------|-----------|---------------------|------|------------------|------------------------------|------------------------------|
|-----------|----------------------------------------------|-----------|---------------------|------|------------------|------------------------------|------------------------------|

---

|      |                                                                                                                                         |                                                    |                               |                   |                                                                                                                                         |                             |   |
|------|-----------------------------------------------------------------------------------------------------------------------------------------|----------------------------------------------------|-------------------------------|-------------------|-----------------------------------------------------------------------------------------------------------------------------------------|-----------------------------|---|
| [20] | HMVECs<br>Cell culture<br>conditioned<br>media                                                                                          | HSC, MS                                            | Extracell<br>ular<br>Vesicles | 100 ±<br>1000 nm  | TEM, LSCM                                                                                                                               | -                           | - |
| [22] | Mouse<br>BALF                                                                                                                           | Centrifugati<br>on and<br>ultracentrif<br>ugation  | Exosome<br>s                  | 30–90 nm          | TEM, Protein<br>dosage, FC                                                                                                              | -                           | - |
| [24] | IMR-90 and<br>THP-1<br>Cell culture<br>conditioned<br>media<br>and Venous<br>blood from<br>patients<br>(pneumoconiosi<br>s and control) | Ultracentrif<br>ugation                            | Exosome<br>s                  | 30–150<br>nm      | TEM, NTA,<br>miRNA<br>Isolation and<br>High-<br>Throughput<br>Sequencing,<br>Immunoblotting<br>RT-qPCR,<br>Immunohistoc<br>hemistry, FC | -                           | - |
| [25] | PBMCs<br>Cell culture<br>conditioned<br>media                                                                                           | Centrifuga<br>tion and ul<br>tracentrif<br>ugation | Exosome<br>s                  | 127.0 ±<br>3.8 nm | TEM, WB,<br>Bradford pro<br>tein assay, FC,<br>SP-ICP-MS,<br>NTA                                                                        | TSG101,<br>CD9, and<br>CD81 | - |

---

---

|      |                                                          |                                                  |                               |               |                                                     |                                                                          |          |
|------|----------------------------------------------------------|--------------------------------------------------|-------------------------------|---------------|-----------------------------------------------------|--------------------------------------------------------------------------|----------|
| [26] | PMQ<br>Cell culture<br>conditioned<br>media              | -                                                | Exosome<br>s                  | 50-100<br>nm  | TEM, SEM,<br>RAMAN                                  | -                                                                        | -        |
|      |                                                          |                                                  | Extracell<br>ular<br>Vesicles | 100-400<br>nm |                                                     |                                                                          |          |
| [39] | PBMC and<br>MDDC<br>Cell culture<br>conditioned<br>media | Ultracentrifugation                              | Exosome<br>s                  | 30–100<br>nm  | TEM, Protein<br>concentration,<br>NTA, FC           | CD81,<br>CD63,<br>CD61,<br>CD86,<br>CD95/Fas<br>L MHC I<br>and<br>MHC II |          |
| [40] | BMSCs<br>Cell culture<br>conditioned<br>media            | Centrifuga-<br>tion and ul-<br>tracentrifugation | Exosome<br>s                  | 116.2 nm      | TEM, NTA, WB                                        | CD9,<br>CD63,<br>CD81,<br>TSG101                                         | Calnexin |
| [41] | Mouse<br>BALF                                            | Centrifuga-<br>tion and ul-<br>tracentrifugation | Exosome<br>s                  | 30–90 nm      | TEM, Protein<br>dosage, WB,<br>EDS, ICP-MS,<br>FACS | TSG101                                                                   | -        |

---

---

|      |                                                      |                                                |                        |                                                        |                                                                                                |                              |              |
|------|------------------------------------------------------|------------------------------------------------|------------------------|--------------------------------------------------------|------------------------------------------------------------------------------------------------|------------------------------|--------------|
| [42] | RAW264.7 and THP-1<br>Cell culture conditioned media | Total Exosomes Isolation Kit                   | Exosomes               | 30.2 ± 8.6 nm<br><br>Exosome aggregation: 196.3 ± 73.2 | EXOCET kit, WB, ICP-OES, DLS                                                                   | CD9, LAMP-1                  | -            |
| [43] | mESCs<br>Cell culture conditioned media              | Ultracentrifugation and filtration             | Extracellular vesicles | 60–70 nm                                               | TEM, WB, NTA, QCM-D, LC-MS/MS                                                                  | CD63, HSP70, and Flotilina-1 | Calreticulin |
| [44] | A549<br>Cell culture conditioned media               | Differential centrifugation and ExoQuick       | Exosomes               | 90–100 nm                                              | DLS, NTA, TEM, SEM, EXOCET™, FP, qRT-PCR, ELISA, BCA                                           | TSG101, CD81, CD63, CD9      | -            |
| [45] | THP1<br>Cell culture conditioned media               | Differential ultracentrifugation and ExoQuick™ | Exosomes               | 50–80 nm.                                              | DLS, NTA, SEM, TEM, EXOCET™, FP, BCA, qRT-PCR, Enzyme-linked immunosorbent assay, ELISA and WB | TSG101, CD9, CD63 and CD81   |              |

---

---

|      |                                                                  |                                                                |                           |               |                                                            |                                                                                                   |       |
|------|------------------------------------------------------------------|----------------------------------------------------------------|---------------------------|---------------|------------------------------------------------------------|---------------------------------------------------------------------------------------------------|-------|
| [46] | iNPs<br>Cortical<br>spheroids<br>Culture<br>conditioned<br>media | Differential<br>ultracentrifugation and<br>PEG-based<br>method | Extracellular<br>Vesicles | 200–250<br>nm | RT-PCR, NTA,<br>TEM                                        | CD63,<br>CD81,<br>Alix,<br>TSG101,<br>Syntenin<br>1,<br>ADAM10<br>,<br>RAB27b,<br>and<br>Syndecan | -     |
| [47] | HUVECs<br>Cell culture<br>conditioned<br>media                   | Exo-spin™<br>kit and<br>centrifugation                         | Exosomes                  | -             | SEM, TEM, FC,<br>AChE activity                             | CD63                                                                                              | -     |
| [48] | VSMCs<br>Cell culture<br>conditioned<br>media                    | Centrifugation and<br>ultracentrifugation                      | Exosomes                  | 100–133<br>nm | TEM, DLS, WB,<br>granular<br>analysis                      | Alix,<br>TSG101,<br>and CD9                                                                       | GAPDH |
| [49] | Astrocytes<br>Cell culture<br>conditioned<br>media               | Centrifugation                                                 | Microvesicles             | 50–500<br>nm  | WB, LSCM,<br>AFM, NTA,<br>FTIR-ATR<br>spectroscopy,<br>UVR | Flotillin-1                                                                                       | -     |
| [50] | HUVECs<br>Cell culture<br>conditioned<br>media                   | Centrifugation                                                 | Extracellular<br>Vesicles | 120 nm        | NTA, TEM, FC                                               | -                                                                                                 | -     |

---

|      |                                               |                                                              |          |       |                                |   |   |
|------|-----------------------------------------------|--------------------------------------------------------------|----------|-------|--------------------------------|---|---|
| [51] | HepG2<br>Cell culture<br>conditioned<br>media | Centrifugation,<br>filtration,<br>and<br>ultracentrifugation | Exosomes | 50 nm | TEM, DLS,<br>LSCM, EDS,<br>SEM | - | - |
|------|-----------------------------------------------|--------------------------------------------------------------|----------|-------|--------------------------------|---|---|

**Table S8.** Modulation of extracellular vesicles and biological outcomes induced by nanomaterials.

| Reference | Morphology     | Size           | Biogenesis                             | Cargo | Functional tests                                                                                                                                                                                                | Biological outcomes                                                                                                                                                                                                                                                                                  |
|-----------|----------------|----------------|----------------------------------------|-------|-----------------------------------------------------------------------------------------------------------------------------------------------------------------------------------------------------------------|------------------------------------------------------------------------------------------------------------------------------------------------------------------------------------------------------------------------------------------------------------------------------------------------------|
| [20]      | -              | -              | ↑ Extracellular<br>vesicles biogenesis | -     | NMCF7, 4T1<br>and HMVEC co-<br>cultivated with EVs<br>containing NMs:<br>Intercellular transfer<br>of NMs through EVs<br>PS+ in                                                                                 | ↑ EVs associated with<br>apoptotic cell;<br>Intercellular transfer of NMs<br>through EVs PS+ in NMCF7,<br>4T1<br>or HMVEC co-cultivated with<br>EVs                                                                                                                                                  |
| [22]      | No alterations | No alterations | ↑ Exosome<br>biogenesis                | -     | <b>In vitro:</b><br>AM $\varphi$ , Raw264.7,<br>and iDCs cells co-<br>cultivated with<br>Exosomes: Exosomes<br>are internalized<br>iDCs co-cultivated<br>with Exosomes:<br>↑ iDC maturation<br>and secretion of | ↑ Exos biogenesis<br>Exos MHCI H-2Kd+, MHCII I-<br>Ad+, and CD80+ secreted are<br>APCs origin.<br><b>In vitro:</b> Exos are internalized<br>by AM $\varphi$ , Raw264.7, and iDCs<br>cells co-cultivated with Exos.<br>↑ iDC maturation and<br>secretion of cytokines DC1<br>and IL-12 Exos mediated. |

|      |   |   |                      |                                                                                                          |                                                                                                                                                                                               |
|------|---|---|----------------------|----------------------------------------------------------------------------------------------------------|-----------------------------------------------------------------------------------------------------------------------------------------------------------------------------------------------|
|      |   |   |                      | cytokines DC1 and IL-12                                                                                  | ↑ Polarizing on T-cell differentiation in Th1 and Tc1 Exos mediated.                                                                                                                          |
|      |   |   |                      | T-cells co-cultivated with Exosomes: ↑ Polarizing on T-cell differentiation in Th1 and Tc1 Exos mediated | ↑ Phagocytic index of AM φ and secretion IL-12, and TNF- α Exos mediated.                                                                                                                     |
|      |   |   |                      | AM φ co-cultivated with Exosomes: ↑ Phagocytic index of AM φ and secretion IL-12, and TNF- α             | <b>In vivo:</b> Exos were distributed in the liver and spleen of BALB/c mice.                                                                                                                 |
|      |   |   |                      | <b>In vivo:</b><br>Exosomes were distributed in the liver and spleen of BALB/c mice                      |                                                                                                                                                                                               |
| [24] | - | - | ↑ Exosome biogenesis | ↓ hsa-let-7a-5p, ↓ hsa-let-7i-5p<br>↑ WASL expression                                                    | IMR-90 fibroblasts co-cultivated with Exosomes: ↑ Fibroblast trans-differentiation<br>↑ Collagen deposition<br>↑ Phagocytosis of NPs                                                          |
|      |   |   |                      |                                                                                                          | ↑ Exosomes biogenesis;<br>↓ hsa-let-7a-5p, ↓ hsa-let-7i-5p<br>↑ WASL expression; ↑ Phagocytosis of NPs<br>↑ Fibroblast transdifferentiation in IMR-90 fibroblasts co-cultivated with Exosomes |

|      |                |                 |                      |                                |                  |                                                                                                                                                                                                 |
|------|----------------|-----------------|----------------------|--------------------------------|------------------|-------------------------------------------------------------------------------------------------------------------------------------------------------------------------------------------------|
|      |                |                 |                      |                                |                  | ↑ Collagen deposition in IMR-90 fibroblasts co-cultivated with Exosomes                                                                                                                         |
| [25] | -              | ↑ Exosomes size | No alterations       | -                              | -                | ↑ Exosomes size and refractive index; AuNPs internalized in Exosomes PBMCs derived Exosomes eliminate AuNPs                                                                                     |
| [26] | -              | -               | ↑ Exosome biogenesis | -                              | -                | ↑ Exosome biogenesis on the surface of macrophages; Exocytosis of SWCNTs through Exosome and Extracellular vesicles; Internalization sustained of SWCNTs in PMQ following exocytosis by Exosome |
| [39] | No alterations | No alterations  | No alterations       | No alterations                 | -                | No alterations in Exosomes secretion, morphology, size, number, protein cargo                                                                                                                   |
| [40] | No alterations | No alterations  | ↑ Exosome biogenesis | MiR-21-5p (miRNA) foi regulado | <b>In vitro:</b> | ↑ Exosomes biogenesis.                                                                                                                                                                          |

|      |                |                |                      |                            |                                                                                                                                                                                                                                                                                                                                                                                                                                                                                                                                       |                                                                                                                                                                                                                                                                                                                                                                                                                                                                                                                                                                                                                                                                                                                                                                                                                                  |
|------|----------------|----------------|----------------------|----------------------------|---------------------------------------------------------------------------------------------------------------------------------------------------------------------------------------------------------------------------------------------------------------------------------------------------------------------------------------------------------------------------------------------------------------------------------------------------------------------------------------------------------------------------------------|----------------------------------------------------------------------------------------------------------------------------------------------------------------------------------------------------------------------------------------------------------------------------------------------------------------------------------------------------------------------------------------------------------------------------------------------------------------------------------------------------------------------------------------------------------------------------------------------------------------------------------------------------------------------------------------------------------------------------------------------------------------------------------------------------------------------------------|
|      |                |                |                      | positively em mag-BMSC-Exo | HUVECs and HSFs co-cultivated with Exosomes:<br>↑ Proliferation, migration, and angiogenesis<br>↑ miR-21-5p, ↓ SPRY2,<br>↑ PI3K/AKT and ERK1/2<br>↑ VEGF, HIF-1 $\alpha$ , PDGFR $\alpha$ , and bFGF<br><br><b>In vivo:</b><br>Exosomes transplanted into skin wounds of mice:<br>↑ Wound closure, ↑ Density of blood vessels, ↑ Collagen deposition, ↓ Scar widths,<br>↑ Angiogenesis, ↑ Formation of sebaceous glands and hair follicles<br><br><b>In vitro:</b><br>Phagocytic and immune system cells co-cultivated with Exosomes: | No morphological, size, shape, and electron density alterations<br><br><b>In vitro:</b> ↑ Proliferation, migration, and angiogenesis in HUVECs and HSFs co-cultivated with Exosomes<br>↑ miR-21-5p, ↓ SPRY2, ↑ PI3K/AKT and ERK1/2<br>↑ Migration, proliferation, and tube formation in HUVECs co-cultivated with Exosomes<br>↑ Migration in HSFs co-cultivated with Exosomes<br>↑ Mature miR-21-5p, VEGF, HIF-1 $\alpha$ , PDGFR $\alpha$ , and bFGF in HUVECs and HSFs co-cultivated with Exosomes<br><br><b>In vivo:</b> ↑ Wound closure, ↑ Density of blood vessels, ↑ Collagen deposition, ↓ Scar widths,<br>↑ Angiogenesis, ↑ Formation of sebaceous glands and hair follicles<br>Exosomes induce<br><br>No morphological and size changes on Exos<br><br><b>In vitro:</b> ↑ Exos biogenesis. Exos induce iDCs maturation. |
| [41] | No alterations | No alterations | ↑ Exosome biogenesis | -                          |                                                                                                                                                                                                                                                                                                                                                                                                                                                                                                                                       |                                                                                                                                                                                                                                                                                                                                                                                                                                                                                                                                                                                                                                                                                                                                                                                                                                  |

|      | Exosomes              | Exosome biogenesis | Exosome secretion    | Exosome uptake                            | Exosome cargo                                                                                                                                     | Exosome effects                                                                                                                                                                                                                                                                                                                                                                                                                                                                         |
|------|-----------------------|--------------------|----------------------|-------------------------------------------|---------------------------------------------------------------------------------------------------------------------------------------------------|-----------------------------------------------------------------------------------------------------------------------------------------------------------------------------------------------------------------------------------------------------------------------------------------------------------------------------------------------------------------------------------------------------------------------------------------------------------------------------------------|
| [42] | -                     | -                  | ↑ Exosome biogenesis | No alterations                            | -                                                                                                                                                 | <p>Exosomes induce iDCs maturation and sensitized T-cell activation and differentiation</p> <p>Exos induce sensitized T-cell activation and differentiation</p> <p><b>In vivo:</b> ↑ Exos biogenesis in the alveolar region of BALB/c mice.</p> <p>Exos MHCI H-2Kd+, MHCII I-Ad+, CD80+, and CD86-secreted are APCs origin.</p> <p>Exos induce systemic immune response through being eliminated from alveolar spaces.</p> <p>↑ Exos biogenesis.</p> <p>No alterations in Ca cargo;</p> |
| [43] | ↑ The rigidity of EVs | -                  | -                    | Differentiall y-expressed protein profile | <p><b>In vitro:</b> 4T1 co-cultivated with Exosomes:</p> <p>↓ Proliferation and migration</p> <p>↓ Cofilin expression and Erk phosphorylation</p> | <p><b>EVs-5:</b> ↑ The rigidity of EVs, differentially-expressed protein profile, and cellular uptake.</p> <p>↓ Proliferation and migration of 4T1 cells co-cultivated with Exos.</p> <p>↓ Cofilin expression and Erk phosphorylation</p> <p><b>sEV-20 and sEV-80:</b> negligible effects.</p>                                                                                                                                                                                          |

|      |                |                                    |                       |                                                                                                    |   |                                                                                                                                                                                                                |
|------|----------------|------------------------------------|-----------------------|----------------------------------------------------------------------------------------------------|---|----------------------------------------------------------------------------------------------------------------------------------------------------------------------------------------------------------------|
| [44] | No alterations | No alterations                     | ↑ Exosomes biogenesis | ↑ Exosomes total protein concentration<br>↑ Concentration of TSG101, CD9, CD63, and CD81 proteins, | - | ↑ Exosomes biogenesis<br>↑ Exosomes total protein concentration<br>↑ Concentrations of TSG101, CD9, CD63, and CD81 proteins,<br>Typical morphology and no significant difference in size was observed.         |
| [45] | No alterations | -                                  | ↑ Exosomes biogenesis | ↑ Exosomes cytokine and chemokine levels (IL-6, MCP-1, IL-8, GM-CSF, TNF-α and IL-1β)              | - | ↑ Exos biogenesis.<br>↑ Exos cytokine and chemokine levels (IL-6, MCP-1, IL-8, GM-CSF, TNF-α and IL-1β). ↑ TSG101, CD9, CD63, and CD81 Exos markers expression levels; No morphological changes were observed. |
| [46] | No alterations | ↓ Extracellular Vesicles mean size | ↑ Exosomes biogenesis | -                                                                                                  | - | <b>8 and 15 nm:</b> ↑ EVs biogenesis.<br><b>30 nm:</b> ↓ EVs mean size<br><br>No morphological changes were observed. Differential gene expression of EV biogenesis markers (CD63,                             |

|      |                           |                |                                     |                                |                                                                                                            |                                                                                                                                                                                                                                              |
|------|---------------------------|----------------|-------------------------------------|--------------------------------|------------------------------------------------------------------------------------------------------------|----------------------------------------------------------------------------------------------------------------------------------------------------------------------------------------------------------------------------------------------|
|      |                           |                |                                     |                                |                                                                                                            | CD81, Alix, TSG101, Syntenin1, ADAM10, RAB27b, and Syndecan) by different size NPs.                                                                                                                                                          |
| [47] | -                         | -              | ↑ Exosomes biogenesis               | -                              | -                                                                                                          | ↑ Exosomes biogenesis                                                                                                                                                                                                                        |
| [48] | -                         | -              | ↑ Exosomes biogenesis               | -                              | -                                                                                                          | ↑ Exosomes biogenesis<br>↑ Ca cargo                                                                                                                                                                                                          |
| [49] | No alterations            | No alterations | ↑ Microvesicles biogenesis          | Altered protein content in EVs | <b>In vitro:</b><br>Neurons co-cultivated with MVs:<br>↑ PSCs, ↓ Neuronal stiffness<br>↑ Synaptic activity | ↑ Microvesicles biogenesis;<br>Altered protein cargo in Microvesicles;<br>No alteration in Microvesicles morphology and size;<br>↑ PSCs in cortical neurons co-cultivated with Microvesicles<br>↓ Neuronal stiffness.<br>↑ Synaptic activity |
| [50] | -                         | -              | ↑ Extracellular Vesicles biogenesis | -                              | -                                                                                                          | ↑ EVs biogenesis;<br>↑ EVs CD105+, PS+, TOM20+                                                                                                                                                                                               |
| [51] | No alterations morphology | No alterations | -                                   | -                              | <b>In vitro:</b>                                                                                           | No changes in Exosomes morphology and size                                                                                                                                                                                                   |

|                          |                                                                                           |                                                                                                                                                                                                  |
|--------------------------|-------------------------------------------------------------------------------------------|--------------------------------------------------------------------------------------------------------------------------------------------------------------------------------------------------|
| Change in surface charge | HepG2 and U87 co-cultivated with Exosomes:<br>↓ Viability,<br>↑ ROS,<br>↓ Cellular uptake | Change in Exosomes surface charge<br><br>↓ Viability in HepG2 and U87 co-cultivated with Exosomes<br><br>Cellular uptake of Exosomes HepG2 and U87<br>↑ ROS in HepG2 co-cultivated with Exosomes |
|--------------------------|-------------------------------------------------------------------------------------------|--------------------------------------------------------------------------------------------------------------------------------------------------------------------------------------------------|

**Table S9.** Report of methodological parameters and EV-TRACK record.

| Reference | Reported Parameters                                                                                   | Parameters not reported                                                                                                                          | EV-METRIC      |
|-----------|-------------------------------------------------------------------------------------------------------|--------------------------------------------------------------------------------------------------------------------------------------------------|----------------|
| [20]      | Electron microscopy images; Specific ultracentrifuge.                                                 | Density gradient; EV density; EV-enriched proteins and non EV-enriched protein; Specific ultracentrifuge; Qualitative and quantitative analysis. | Not registered |
| [22]      | Specific ultracentrifuge; EV-enriched proteins ;<br>Electron microscopy images; Qualitative analysis. | Density gradient; EV density; non EV-enriched protein-; Quantitative analysis.                                                                   | Not registered |

---

|      |                                                                                                                                                                    |                                                                                                                                                  |                |
|------|--------------------------------------------------------------------------------------------------------------------------------------------------------------------|--------------------------------------------------------------------------------------------------------------------------------------------------|----------------|
| [24] | Specific ultracentrifuge; Qualitative and quantitative analysis; Electron microscopy images .                                                                      | Density gradient; EV density; EV-enriched proteins and non EV-enriched protein .                                                                 | Not registered |
| [25] | Specific ultracentrifuge; Lysate preparation; Qualitative and quantitative analysis; EV-enriched proteins-.                                                        | Density gradient; EV density; Electron microscopy images-; non EV-enriched protein.                                                              | Not registered |
| [26] | Not applicable.                                                                                                                                                    | Density gradient; EV density; EV-enriched proteins; Specific ultracentrifuge; Qualitative and quantitative analysis; Electron microscopy images. | Not registered |
| [39] | EV-enriched proteins; Electron microscopy images; Specific ultracentrifuge; Qualitative and quantitative analysis.                                                 | Density gradient; EV density.                                                                                                                    | 57%            |
| [40] | Specific ultracentrifuge; Qualitative and quantitative analysis; Electron microscopy images; EV-enriched protein and non EV-enriched protein ; Lysate preparation. | Density gradient.                                                                                                                                | Not registered |

---

|      |                                                                                                                                   |                                                                                                                                                                              |                |
|------|-----------------------------------------------------------------------------------------------------------------------------------|------------------------------------------------------------------------------------------------------------------------------------------------------------------------------|----------------|
| [41] | Not applicable.                                                                                                                   | Density Gradient; EV density; Specific ultracentrifuge; EV-enriched proteins and non EV-enriched protein; Qualitative and quantitative analysis; Electron microscopy images. | 0%             |
| [42] | Specific ultracentrifuge; Qualitative and quantitative analysis; EV-enriched proteins; Lysate preparation.                        | Qualitative analysis; Density gradient; EV density; Electron microscopy images .                                                                                             | Not registered |
| [43] | EV-enriched proteins and non EV-enriched protein; Electron microscopy images ; EV density; Qualitative and quantitative analysis. | Density Gradient; Specific ultracentrifuge; Lysate preparation.                                                                                                              | Not registered |
| [44] | EV density; Electron microscopy images; Qualitative and quantitative analysis; EV-enriched proteins .                             | Density Gradient; Specific ultracentrifuge; non EV-enriched protein; Lysate preparation.                                                                                     | Not registered |
| [45] | EV Density; Electron microscopy images; Qualitative and quantitative analysis; EV-enriched proteins .                             | Density Gradient; Specific ultracentrifuge; ; non EV-enriched protein; Lysate preparation.                                                                                   | Not registered |

---

|      |                                                                                                                                                             |                                                                                                                                  |                |
|------|-------------------------------------------------------------------------------------------------------------------------------------------------------------|----------------------------------------------------------------------------------------------------------------------------------|----------------|
| [46] | EV Density; Electron microscopy images; Qualitative and quantitative analysis<br>EV-enriched proteins; Specific ultracentrifuge.                            | Density Gradient; non EV-enriched protein; Lysate preparation.                                                                   | Not registered |
| [47] | Electron microscopy images; Specific ultracentrifuge; Qualitative and quantitative analysis; EV-enriched proteins.                                          | EV density; Density gradient; Non EV-enriched protein; Lysate preparation.                                                       | Not registered |
| [48] | Specific ultracentrifuge; Electron microscopy images; Qualitative and quantitative analysis; EV-enriched proteins and non EV-enriched proteins; EV density. | Density gradient; Lysate preparation.                                                                                            | Not registered |
| [49] | Specific ultracentrifuge; Qualitative and quantitative analysis.                                                                                            | EV-enriched proteins and non EV-enriched protein; Electron microscopy images; EV; Lysate preparation.                            | Not registered |
| [50] | Specific ultracentrifuge; EV density; Quantitative analysis.                                                                                                | Density gradient; EV density; Qualitative analysis; Electron microscopy images; EV-enriched protein and non EV-enriched protein. | Not registered |

---

|      |                                                                                                                            |                                                   |                |
|------|----------------------------------------------------------------------------------------------------------------------------|---------------------------------------------------|----------------|
| [51] | Electron microscopy images; Specific Density gradient; EV density; ultracentrifuge; Qualitative and quantitative analysis. | EV-enriched proteins and non EV-enriched protein. | Not registered |
|------|----------------------------------------------------------------------------------------------------------------------------|---------------------------------------------------|----------------|

---

**Table S10.** Overall score and categorization of the reliability of studies (ToxRTool).

| Reference | Score | Category A | Category B |
|-----------|-------|------------|------------|
| [20]      | 17    | 2          | 3          |
| [22]      | 10    | 3          | 3          |
| [24]      | 10    | 3          | 3          |
| [25]      | 13    | 2          | 3          |
| [26]      | 12    | 2          | 3          |
| [39]      | 18    | 1          | 1          |
| [40]      | 16    | 1          | 1          |
| [41]      | 15    | 2          | 3          |
| [42]      | 14    | 2          | 2          |
| [43]      | 17    | 1          | 1          |
| [44]      | 16    | 1          | 3          |
| [45]      | 17    | 1          | 3          |
| [46]      | 15    | 1          | 3          |

|      |    |   |   |
|------|----|---|---|
| [47] | 18 | 1 | 3 |
| [48] | 17 | 1 | 3 |
| [49] | 16 | 1 | 1 |
| [50] | 16 | 1 | 1 |
| [51] | 13 | 2 | 3 |

**Table S11.** Analysis of compliance in reporting animal research (ARRIVE 2.0 checklist).

| Description of items              | [20] |    |           | [40] |    |           | [41] |    |           | [47] |    |           |
|-----------------------------------|------|----|-----------|------|----|-----------|------|----|-----------|------|----|-----------|
|                                   | Yes  | No | Partially | Yes  | No | Partially | Sim  | No | Partially | Sim  | No | Partially |
| 1. Study Design                   | X    |    |           | X    |    |           | X    |    |           |      |    | X         |
| 2. Sample Size                    |      |    | X         |      |    | X         |      |    | X         |      |    | X         |
| 3. Inclusion & Exclusion Criteria |      | X  |           | X    |    |           |      | X  |           |      | X  |           |
| 4. Randomisation                  | X    |    |           | X    |    |           | X    |    |           |      | X  |           |
| 5. Blinding                       | X    |    |           |      | X  |           | X    |    |           |      | X  |           |

|                            |   |  |   |   |   |   |   |   |
|----------------------------|---|--|---|---|---|---|---|---|
| 6. Outcomes Measures       | X |  | X |   | X |   | X |   |
| 7. Statistical Methods     | X |  | X |   | X |   | X |   |
| 8. Experimental Animals    | X |  | X |   | X |   |   | X |
| 9. Experimental Procedures |   |  | X | X |   | X |   |   |
| 10. Results                | X |  | X |   | X |   | X |   |

**Table S12.** Quality assessment of case-control studies (Newcastle-Ottawa Scale (NOS)).

| Reference | Selection          | Comparability | Exposure | Score |
|-----------|--------------------|---------------|----------|-------|
| [22]      | ★ ★ ★ <sup>1</sup> | ★ ★           | ★ ★ ★    | 8/9   |

<sup>1</sup> Newcastle-Ottawa Scale (NOS) “Star system” in which a study is judged from three broad perspectives: the selection of study groups; the comparability of the groups; and verification of exposure or outcome of interest for case-control or cohort studies, respectively. For each attribute met, the study receives one star, with a maximum number of stars: selection (0–4 points), comparability (0– 2 points) and exposure (0– 3 points).
